# Supplementary material for: Optimised biomolecular extraction for metagenomic analysis of microbial biofilms from high-mountain streams
Source: PubMed Central journal article supplement (PMC7597623; doi:10.7717/peerj.9973), 2020-10-27
Supplement: peerj-08-9973-s001.pdf [file peerj-08-9973-s001.pdf]

1 **Optimising biomolecular component extraction for meta-omic sequencing of microbial**  
2 **biofilms from high-mountain streams**

3 Susheel Bhanu Busi<sup>1,#</sup>, Paraskevi Pramateftaki<sup>2,#</sup>, Jade Brandani<sup>2</sup>, Stilianos Fodelianakis<sup>2</sup>,  
4 Hannes Peter<sup>2</sup>, Rashi Halder<sup>1</sup>, Paul Wilmes<sup>1</sup> and Tom J. Battin<sup>2,\*</sup>

5

6 <sup>1</sup>Systems Ecology Research Group, Luxembourg Centre for Systems Biomedicine, University  
7 of Luxembourg, Esch-sur-Alzette, Luxembourg

8 <sup>2</sup>Stream Biofilm and Ecosystems Research group, Ecole Polytechnique Fédérale de  
9 Lausanne, Lausanne, Switzerland

10

11 **Extraction protocols**

12 **Method -1**

- 13 1. Add 0.4 g of the sample in a lysis matrix E tube, 500 µl CTAB Extraction buffer (5%  
14 CTAB, 120 mM KPO<sub>4</sub>, pH 8) and bead beat in the Precellys at 5.500 r/s for 5.
- 15 2. Add 500 µl of Phenol:Choloform:Isoamyl alcohol (25:24:1) close the tubes very  
16 carefully and bead beat them in the Precellys at 5.500 r/s for 45 sec, sec, modified from  
17 original.
- 18 3. Centrifuge for 10 min at 13000 g, at 4 °C.
- 19 4. Transfer the supernatant (app. 600 µl) to a 2-ml tube and extract with 1vol of  
20 chloroform:Isoamyl alcohol (24:1).
- 21 5. Centrifuge for 5 min at 13.000xg, at 4 °C.
- 22 6. Transfer the supernatant (600 µl) to a 2-ml tube.
- 23 7. Add 5.4 µl of linear acrylamide (15 µg/ml in 1800 µl total, modified from original) and  
24 extract with 2 vol of PEG-6000 and precipitate for 2 h on ice.
- 25 8. Centrifuge for 60 min at 13.000xg, at 4°C.
- 26 9. Decant and remove rest carefully with a pipette.
- 27 10. Add 1000 µl of ice-cold 70% Ethanol and vortex briefly.
- 28 11. Centrifuge for 10 min at 13.000xg, at 4 °C.
- 29 12. Decant and remove rest carefully with a pipette.
- 30 13. Wash with 70% ethanol once more.
- 31 14. Dry the total nucleic acid for 5 min at RT (or longer until residues of alcohol are  
32 evaporated)
- 33 15. Elute pellet in 50 µl of molecular grade water

34

35 **Method-2**

36 *IMPORTANT: Keep sediment cold throughout the extraction procedure.*

37 1. Add up to 5 g of sediment per 15 ml bead-beating tube filled to 10-20% with 0.1-mm  
38 Zirconium beads per volume (modified from original).

39 2. Add 1 ml of 10 mM dNTP solution. Gently shake to entirely soak or coat the sample.

40 *Purpose: dNTP has similar sorption characteristics to DNA. Coating sediment/mineral  
41 surfaces with dNTP thus reduces DNA sorption and drastically enhances DNA recovery  
42 from mineral-rich, oligotrophic samples*

43 3. Add 5 mL lysis solution I (30 mM Tris HCl, 30 mM EDTA, 800 mM guanidine  
44 hydrochloride, 0.5 % Triton X-100, final pH 10), and homogenize by inverting and  
45 tapping. Vortex briefly.

46 4. Place tubes in horizontal holder on Vortex Genie and shake at maximum speed for 30s.  
47 Incubate at 50 °C for 1 hour in a hybridization oven with rotation.

48 5. Spin down sediment at 10,000×g and 4 °C for 10 min and transfer supernatant to clean  
49 Eppendorf tube. Transfer as much supernatant as possible.

50 6. Add 1 volume of cold 24:1 chloroform-isoamyl alcohol mixture to supernatant. Mix by  
51 vortexing for 10 s and spin at 4 °C for 10 min at 10,000×g. Repeat this wash once, taking  
52 care to avoid any chloroform and particle transfer after second wash.

53 *Purpose: Chloroform removes residual proteins, membrane lipids and detergents by  
54 dissolution or accumulation at the aqueous interface. Isoamylalcohol helps produce a  
55 clean interface between the aqueous phase containing DNA and the chloroform. If the  
56 interface nonetheless falls apart during this step, briefly centrifuge again for 1 min. If the  
57 supernatant is clear and free of chloroform or particles after the first chloroform wash,  
58 you can omit the second wash and proceed to the next step.*

59 7. To each DNA extract, add linear polyacrylamide (LPA) to a concentration of 10 µg/mL,  
60 and 0.2 volumes of 5M sodium chloride. Mix briefly by inverting 3 times. Then add 2.5  
61 volume ethanol, mix thoroughly, and precipitate in dark at room temperature for 2 hrs.

62 *Avoid premixing the LPA and ethanol, since it will precipitate the LPA before the LPA has  
63 come into contact with DNA.*

64 8. Centrifuge at room temperature and 14,000×g for 30 min.

65 9. Decant supernatant, spin the tubes briefly, pipette residual ethanol and let pellets to dry.  
66 A small residue of water (moist pellet) poses no problem, and in fact is preferable, since  
67 it makes resuspension easier and reduces DNA shearing due to desiccation

68 10. Resuspend pellet in molecular grade water and let it stand overnight at 4 °C to dissolve.

69

70 **Method-3**

71 (Alternative DNeasy PowerMax Soil Protocol for RNA/DNA from low biomass Soil with  
72 low humics)

73 1. Add 5 grams of soil to the bead tube.

74 2. Add 5 ml of phenol:chloroform:isoamyl alcohol (25:24:1), pH 8 (modified from  
75 original).

76 3. Add 10 ml PowerBead Solution and 1 ml Solution C1.

77 4. Homogenize horizontally on a vortex in a 50 ml tube adapter for 10 minutes.

78 5. Centrifuge 4500 x g for 8 minutes. For centrifuges with low g-force, spin longer. E.g.  
79 2500 x g for 15 minutes.

80 6. Remove the supernatant. Depending on the soil, there may or may not be a visible  
81 upper aqueous layer. If visible, remove only the upper aqueous layer to a new 50 ml  
82 tube. It should be about 10 ml. If RNA is not desired add 10 ul of RNase A to the  
83 collection tube after the aqueous portion is transferred and incubate at room  
84 temperature for 10 minutes.

85 7. Add 1.5 ml of Solution C2. Cap and shake to mix. Add 1.5 ml of Solution C3. Cap  
86 and shake to mix. Centrifuge for 5 minutes at 4500 x g. Note: If the lysate is fairly  
87 clear after step 6, then adding 1 ml Solution C2 and 1 ml Solution C3 may be  
88 sufficient.

89 8. Transfer the supernatant to a new tube (~13-14 ml).

90 9. Add an equal volume (14 ml) of Solution C4. Add 14 ml of 100% ethanol. Mix well  
91 (vortex or invert).

92 10. Load 15 ml of lysate onto the DNeasy PowerMax column.

93 11. Centrifuge 3 minutes at 4500 x g. Discard the flow-through.

94 12. Repeat step 10 and 11 until the entire lysate is loaded onto the column.

- 95 13. For each prep, prepare the first wash buffer. In a separate tube mix 9 ml of Solution  
96 C4 and 11 ml of 100% ethanol. Load onto to the column. Centrifuge 4500 x g for 3  
97 minutes. Discard the flow-through.
- 98 14. Wash with 10 ml of Solution C5. Centrifuge 3 minutes at 4500 x g. Discard the flow-  
99 through (x2).
- 100 15. Wash with 10 ml of 100% ethanol. Centrifuge 3 minutes at 4500 x g. Discard the  
101 flow-through (x2).
- 102 16. Centrifuge for 10 minutes at 4500 x g in order to dry the column.
- 103 17. Place the column into a clean 50 ml tube. Leave the cap off and allow to air dry for  
104 10 minutes further.
- 105 18. Elute the DNA/RNA in 6 ml Solution C6 (10 mM Tris-HCl, pH 8.5)
- 106 19. Centrifuge 5 minutes at 4500 x g.
- 107 20. Optional: Reserve a 50 ul aliquot of eluate and check it on a nanodrop or a gel.
- 108 21. To concentrate the DNA/RNA, ethanol precipitate. Add NaCl to a final concentration  
109 of 0.2 M. For the expected 5.5 ml eluate, add 240 ul of 5M NaCl. Add 2.5 volumes  
110 (14 ml) of 100% ethanol. Optional: add linear acrylamide as a carrier: 10 ul of  
111 5mg/ml. Invert, shake or vortex to mix. Freeze at -20C for at least an hour or  
112 overnight.
- 113 22. Centrifuge 35 minutes at 4500 x g to pellet the DNA/RNA. Wash the pellet with 70%  
114 ethanol (5 ml) and then centrifuge again for 10 minutes at 4500 x g to re-pellet. Decant  
115 the ethanol and then turn right side up and allow to air dry until traces of ethanol are  
116 mostly gone. Resuspend the pellet in a suitable volume.

117

#### 118 **Method-4**

119 *Remark: Every time the tubes are open ensure that there is no liquid on the lids by applying a*  
120 *short spin*

- 121 1. For 5 g of sediment, add 10 mL of Lysis buffer (0.1 M Tris-HCl pH 7.5, 0.05 M EDTA  
122 pH 8.0, 1.25 % SDS), 10 µl of RNase (100 mg/ml, Qiagen 19101) and vortex vigorously  
123 for 15s (use 50-ml tube).
- 124 2. Incubate at 37 °C for 1 hour in a hybridization oven with rotation.

- 125 3. Spin samples, add 100 µl Proteinase K (20 mg/ml, ThermoFisher Scientific Cat.No.  
126 25530049) and mix a few times.
- 127 4. Incubate at 70 °C for 10 min (statically).
- 128 5. Spin samples and add 15 ml of Phenol:Chloform:Isoamyl alcohol (pH 8.05,  
129 ThermoFisher Scientific Cat.No. 15593049).
- 130 6. Mix thoroughly and centrifuge at 7.500 g at 4 °C for 15 minutes.
- 131 7. Transfer aqueous phase into a new 50-ml tube and add 10 ml Chloroform – isoamyl  
132 alcohol mixture (24:1).
- 133 8. Mix thoroughly and centrifuge at 7.500 g at 4 °C for 10 min.
- 134 9. Transfer supernatant to a new 50 ml tube and add 10 µl of LPA (Life Technologies,  
135 AM9520) mix well and then add 1/10 volume of 3M sodium acetate (pH 8.0).
- 136 10. Add 1 volume of ice-cold Isopropanol and mix thoroughly.
- 137 11. Precipitate DNA at -20 °C overnight.
- 138 12. Centrifuge at 12.000 g at 4 °C for 35 minutes.
- 139 13. Remove supernatant and discard without disturbing the pellet.
- 140 14. Wash with 5 ml of 70% Ethanol and centrifuge at 7.500 g at 4 °C for 10-15 minutes.
- 141 15. Centrifuge the pellet after washes to collect any residual ethanol.
- 142 16. Air-dry the pellet, and elute with 105 ul RNase-free, DNase-free water.
- 143 17. Let DNA pellet to dissolve overnight at 4 °C.
